# Supplementary material for: A New Oleanane Type Saponin from the Aerial Parts of Nigella sativa with Anti-Oxidant and Anti-Diabetic Potential
Source: PubMed Central journal article supplement (PMC7248923; doi:10.3390/molecules25092171), 2020-05-06
Supplement: molecules-25-02171-s001.pdf [file molecules-25-02171-s001.pdf]

## HNMR Data

**1:** **3-O- $[\beta$ -D-xylopyranosyl-(1-3)- $\alpha$ -L-rhamnopyranosyl-(1-2)- $\alpha$ -L-arabinopyranosyl]-28-O- $[\alpha$ -L-rhamnopyranosyl-(1-4)- $\beta$ -D-glucopyranosyl-(1-6)- $\beta$ -D-glucopyranosyl]-hederagenin:**<sup>1</sup>  **$^1$ HNMR (CD<sub>3</sub>OD, 600MHz):**  $\delta$  5.35 (1H, d, J= 8.22, H-1'''''), 5.31 (1H, d, J= 8.16, H-1'''''),  $\delta$  5.25 (1H, t, H-12), 5.22 (1H, s, H-1'), 5.22 (1H, s, H-1'''''), 4.55 (1H, d, J= 5.28 H-1'''), 4.51 (1H, d, J=5.64, H-1'), 3.1-4.1 (sugar moieties overlapped), 0.70 (3H, s, H-24) 0.79 (3H, s, H-26), 0.90 (3H, s, H-29), 0.94 (3H, s, H-30), 0.97 (3H, s, H-25), 1.16 (s, 3H each, H-27) 1.23 (m, 6H, 2CH<sub>3</sub>, H-6'' & H-6''''').  **$^{13}$ CNMR (CD<sub>3</sub>OD, 600MHz)**  $\delta$  12.41 (C-24), 15.13 (C-25), 16.46 (C-6'''''), 16.59 (C-6''), 17.43 (C-6), 22.63 (C-30), 22.67 (C-16), 23.15(C-11), 24.93(C-27), 25.01(C-2), 27.52(C-15), 30.12(C-20), 31.01(C-7 & 22), 31.94 (C-29). 33.48 (C-21), 36.23 (C-10), 38.2 (C-1), 38.38(C-8), 41.12(C-18), 41.61(C-14), 42.58(C-4), 45.82(C-17), 46.3 (C-19), 46.65 (C-5), 48.1 (C-9), 63.18 (C-23), 76.58 (C-3), 94.35 (C-1'''''), 101.1(C-1'''''), 101.3 (C-1'') 102.95 (C-1'''), 103.22 (H-1'''''), 105.15 (C-1'), 122.39 (C-12), 143.50 (C-13), 176.68 (C-28) and other signals are similar according to literature.

**2: Compound 2: Flaccidoside III (first time from genus nigella):**<sup>1</sup>  **$^1$ HNMR (CD<sub>3</sub>OD, 600MHz)**  $\delta$  5.33 (1H, d, J= 7.38, H-1'''''), 5.25 (1H, t, H-12), 5.23 (1H, s, H-1''), 5.22 (1H, s, H-1'''''), 4.51 (1H, d, J=5.58, H-1'),  $\delta$  4.49 (1H, d, J= 7.38, H-1'''''),  $\delta$  4.41 (1H, d, J= 7.38, H-1'''), 3.3-4.1 (sugar moieties overlapped), 0.70 (3H, s, H-24) 0.80 (3H, s, H-26), 0.91 (3H, s, H-29), 0.94 (3H, s, H-30), 0.98 (3H, s, H-25), 1.16 (s, 3H each, H-27) 1.23 (m, 6H, 2CH<sub>3</sub>, H-6'' & H-6''''').<sup>13</sup>  **$^{13}$ CNMR (CD<sub>3</sub>OD, 600MHz)**  $\delta$  176.74 (C-28), 143.51 (C-13), 122.68 (C-12), 105.15 (C-1'), 103.3 (C-1'''), 101.52(C-1''), 99.93 (C-1'''''), 94.35 (C-1'''''), 76.58 (C-3), 65.60 (C-6'''''), 64.10 (C-6'''''), 63.18 (C-23), 60.47 (C-6'''''), 48.1 (C-9), 46.65 (C-5), 46.3 (C-19), 45.82 (C-17), 42.58 (C-4), 41.61(C-14), 41.11 (C-18), 39.27 (C-8), 38.33 (C-1), 36.24 (C-10), 33.52 (C-21), 32.09 (C-29), 31.87 (C-7 & 22), 30.14 (C-20), 27.53 (C-15), 25.20 (C-2), 24.97(C-27), 23.17(C-11), 22.64 (C-16), 22.64 (C-30), 17.44 (C-6), 16.62 (C-6''), 15.17 (C-25), 12.44 (C-24), and other signals are similar according to literature.

**3: Catechol:**<sup>1</sup>  **$^1$ HNMR (CD<sub>3</sub>OD, 600MHz)**  $\delta$  8.18(s, 2H, H-3 & 6), 8.11 (s, 2H, H-4 & 5)<sup>13</sup>  **$^{13}$ CNMR (CD<sub>3</sub>OD, 600MHz)**  $\delta$  152.25 (C-1 & 2), 139.79 (C-3 & 6).

**4: Quercetin-3-gentiobiosides:**<sup>1</sup>  **$^1$ HNMR (CD<sub>3</sub>OD, 600MHz)**  $\delta$  7.77 (1H, dd, J=2.16, 8.58, H-6'), 7.65 (1H, d, J=2.22, H-2'), 7.35 (1H, d, J=8.64, H-5'), 6.3 (1H, s, H-8), 6.1 (1H, s, H-6), 5.03 (1H, d, J=7.26, H-1''), 4.72 (1H, d, J=7.74, H-1''') 3.2-3.9(disaccharide moieties overlapped). <sup>13</sup>  **$^{13}$ CNMR (CD<sub>3</sub>OD, 600MHz)** 159.0 (C-2), 135.0 (C-3), 179.6 (C-4), 163.0 (C-5), 99.8 (C-6), 166.0 (C-7), 94.7 (C-8), 158.4 (C-9), 105.1 (C-10), 122.8 (C-1'), 116.2 (C-2'), 146.1 (C-3'), 149.8 (C-4'), 117.4 (C-5'), 123.1 (C-6'), 104.5 (C-1''), 75.6 (C-2''), 78.2 (C-3''), 71.2 (C-4''), 77.7 (C-5''), 66.2 (C-6'').

**5: Magnoflorine:** <sup>1</sup>HNMR (CD<sub>3</sub>OD, 600MHz) 6.61 (1H, d, J=7.86, H-8), 6.38 (1H, d, J=7.8, H-9), 6.34 (1H, s, H-3), 3.80 (3H, s, OMe-2), 3.71 (3H, s, OMe-10), 3.60 (2H, m, H-5), 3.14 (3H, s, N-CH<sub>3</sub>), 3.02 (2H, m, H-4), 2.65 (3H, s, N-CH<sub>3</sub>).<sup>13</sup> **CNMR (CD<sub>3</sub>OD, 600MHz)**

151.51 (C-2), 150.2 (C-10), 149.34 (C-11), 148.40 (C-1), 124.6 (C-7a), 122 (C-8), 119.59 (C-3a), 115.5 (11-a), 114.3 (1-a), 109.13 (C-9), 107.94 (C-3), 69.44 (C-6a), 60.74 (C-5), 54.89 (OMe-C10), 54.59 (OMe C11), 52.43, 42.122 (N<sup>+</sup>Me), 30.15 (C-7), 23.18 (C-4).

**6: Nigelflavonoside B:** <sup>1</sup>HNMR (CD<sub>3</sub>OD, 600MHz) δ 7.7 (1H, d, J=2.16, H-6'), 7.55 (1H, dd, J=2.16, 8.46, H-2'), 6.91 (1H, d, J=8.46, H-3'), 6.36 (1H, s, H-8), 6.17 (1H, s, H-6), 5.24 (1H, d, J=7.26, H-1''), 4.73 (1H, d, J=7.74, H-1'''), 4.67 (1H, d, J=7.68, H-1'''), 4.50 (1H, s, H-1'''), 3.2-3.9 (disaccharide moieties overlapped), 1.10 (3H, d, H-6''').<sup>13</sup> **CNMR (CD<sub>3</sub>OD, 600MHz)** 177.9 (C-4), 164.38 (C-7), 161.6 (C-5), 157.03 (C-9 & 2), 148.3 (C-4'), 144.30 (C-3'), 133.4 (C-3), 121.84 (C-1' & 6'), 116.43 (C-2'), 114.84 (C-5'), 105.01 (C-10), 104.25 (C-1'''), 103.61 (C-1'''), 100.67 (1'''), 99.59 (C-6), 98.47 (C-1''), 83.83 (C-2''), 82.27 (C-2'''), 77.39 (C-5'''), 76.19 (C-3'''), 75.93 (C-3''), 75.65 (C-5''), 74.91 (5'''), 73.63 (C-3'''), 72.49 (C-6''), 70.74 (C-4'''), 70.64 (C-3'''), 69.59 (C-2'''), 69.16 (C-4''), 60.82 (C-6'''), 60.43 (C-6'''), 16.45 (C-6''').

**Nigelloside:** <sup>1</sup>HNMR (CD<sub>3</sub>OD, 600MHz) δ 8.05 (2H, d, J=8.82, H-2' & 6'), 6.94 (2H, d, J=8.82, H-3' & 5'), 6.36 (1H, s, H-8), 6.17 (1H, s, H-6), 5.39 (1H, d, J=7.5, H-1''), 4.73 (1H, d, J=7.68, H-1'''), 4.67 (1H, d, J=7.68, H-1'''), 4.50 (1H, s, H-1'''), 3.2-3.9 (disaccharide moieties overlapped), 1.13 (3H, d, H-6''').<sup>13</sup> **CNMR (CD<sub>3</sub>OD, 600MHz)** 178.1 (C-4), 164.43 (C-7), 161.63 (C-5), 159.96 (C-4'), 157.06 (C-2,9), 133.2 (C-3), 131.84 (C-2' & 6'), 121.43 (C-1'), 114.89 (C-3', 5'), 104.33 (C-10), 103.39 (C-1''), 100.72 (1'''), 99.40 (C-1'''), 98.47 (C-6), 83.83 (C-2''), 82.27 (C-2'''), 77.39 (C-5'''), 76.19 (3'''), 75.93 (C-3''), 75.65 (C-5''), 74.91 (5'''), 73.59 (C-3'''), 72.49 (C-6''), 70.74 (C-4'''), 70.64 (C-3'''), 69.59 (C-2'''), 69.29 (C-4''), 68.27 (C-4'''), 66.57 (C-6''), 60.90 (C-6'''), 60.43 (C-6'''), 16.45 (C-6''').

**8: Quercetin sphorotrioside:** <sup>1</sup>HNMR (CD<sub>3</sub>OD, 600MHz) δ 7.75 (1H, d, J=2.16, H-6'), 7.55 (1H, dd, J=2.16, 8.46, H-2'), 6.91 (1H, d, J=8.46, H-3'), 6.35 (1H, s, H-8), 6.16 (1H, s, H-6), 5.29 (1H, d, J=7.14, H-1''), 4.73 (1H, d, J=7.68, H-1'''), 4.67 (1H, d, J=7.38, H-1'''), 3.2-3.9 (disaccharide moieties overlapped), 1.10 (3H, d, H-6''').<sup>13</sup> **CNMR (CD<sub>3</sub>OD, 600MHz)** 177.9 (C-4), 164.38 (C-7), 161.67 (C-5), 157.03 (C-9 & 2), 148.3 (C-4'), 144.30 (C-3'), 133.4 (C-3), 121.84 (C-1' & 6'), 116.36 (C-2'), 114.83 (C-5'), 105.07 (C-1'''), 104.35 (C-1'''), 103.659 (C-10), 99.61 (C-6), 98.47 (C-1''), 83.83 (C-2''), 82.27 (C-2'''), 77.39 (C-5'''), 76.95 (C-5'''), 76.19 (C-5''), 75.93 (C-3''), 75.65 (C-5''), 74.91 (3''), 74.78 (C-3'''), 73.63 (C-2'''), 69.59 (C-4''), 68.83 (C-4'''), 68.26 (C-6''), 60.93 (C-6'''), 60.39 (C-6''').

**9: kaempferol-3, 7-diglucoside:** <sup>1</sup>HNMR (CD<sub>3</sub>OD, 600MHz)

δ 8.08 (2H, d, J=8.88, H-2' & 6'), 6.90 (2H, d, J=8.76, H-3' & 5'), 6.38 (1H, s, H-8), 6.19 (1H, s, H-6), 5.33 (1H, d, J=7.62, H-1''), 4.74 (1H, d, J=7.68, H-1'''), 3.3-3.8 (sugar moieties).

<sup>13</sup> CNMR (CD<sub>3</sub>OD, 600MHz) 178.38 (C-4), 164.82 (C-7), 160.14 (C-5), 157.22 (C-4'), 157.08 (C-2,9), 133.48 (C-3), 130.94 (C-2' & 6'), 121.27 (C-1'), 114.84 (C-3', 5'), 104.22 (C-10), 103.39 (C-1'''), 100.08 (1''), 98.50 (C-6), 93.33 (C-8), 77.4 (C-3'',5'',3''', 5''') 74.06 & 73.42 (C-2''' & 2''), 69.89 (C-4''), 69.7(C-4'''), 61.1 (C-6'', 6''').

**10: kaempferol 3-O-rutinoside:** <sup>1</sup>HNMR (CD<sub>3</sub>OD, 600MHz) δ 8.05 (2H, d, J=8.76, H-2' & 6'), 6.87 (2H, d, J=8.76, H-3' & 5'), 6.38 (1H, s, H-8), 6.19 (1H, s, H-6), 5.12 (1H, d, J=7.44, H-1''), 4.51 (1H, s, H-1'''), 3.3-3.8(sugar moieties), 1.12 (3H, d, J=6.20, H-6''') <sup>13</sup> CNMR (CD<sub>3</sub>OD, 600MHz) 177.94 (C-4), 164.64 (C-7), 161.53 (C-5), 160.04 (C-4'), 157.96 (C-9), 157.08 (C-2), 134.10 (C-3), 130.94 (C-2' & 6'), 121.30 (C-1'), 114.71 (C-3', 5'), 104.22 (C-10), 103.22 (C-1''), 101.08 (1'''), 98.50 (C-6), 93.33 (C-8), 76.72 (C-3''), 75.77 (C-5''), 74.31 (C-2''), 72.48 (C-4''), 70.068(C-4'''), 70.61 (C-2'''), 69.99 (C-3'''), 68.30 (C-5'''), 67.17 (C-6''), 16.50 (C-6''').

**11: Rutin:** <sup>1</sup>HNMR (DMSO-d<sub>6</sub>, 600MHz) δ 7.5 (2H, s, H-2' & 6'), 6.8 (1H, s, H-5'), 6.36 (1H, s, H-8), 6.17 (1H, s, H-6), 5.31 (1H, s, H-1''), 4.36 (1H, s, H-1'''), 3.2-3.9(disaccharide moieties overlapped), 0.97 (3H, H-6'''). <sup>13</sup> CNMR (DMSO-d<sub>6</sub>, 600MHz) 177.67 (C-4), 164.86 (C-7), 161.63 (C-5), 156.96 (C-9 & 2), 148.95 (C-4'), 145.22 (C-3'), 133.69 (C-3), 122.03 (C-1'), 121.53 (C-6'), 116.43 (C-5'), 114.84 (C-2'), 104.21 (C-10), 101.72 (1'''), 101.17 (C-1'''), 99.29 (C-6), 94.15 (C-8), 76.90 (C-3''), 76.32 (C-5''), 74.50 (C-2''), 72.28 (C-4'''), 70.99 (C-4'', 2''), 70.41 (C-3'''), 68.65 (C-5'''), 67.39 (C-6''), 18.17 (C-6''').

**12: 3-O-[α-L-rhamnopyranosyl-(1→2)-α-L-arabinopyranosyl]-hederagenin:** <sup>1</sup>HNMR

(CD<sub>3</sub>OD, 600MHz) δ 5.15 (1H, t, H-12), 5.14 (1H, s, H-1''), 4.55 (1H, d, J= 5.16, H-1'''), 3.2-3.9 (sugar moieties), 0.69 (3H, s, H-24 ) 0.82 (3H, s, H-26), 0.93 (3H, s, H-29), 0.96 (3H, s, H-30), 0.99 (3H, s, H-25), 1.18 (s, 3H each, H-27) 1.23 (3H, CH<sub>3</sub>, H-6'''). <sup>13</sup> CNMR (CD<sub>3</sub>OD, 600MHz) δ 178.88 (C-28), 142.93 (C-13), 122.56 (C-12), 102.87 (C-1''), 100.47 (C-1'), 80.84 (C-3), 75.25 (C-2'') 72.51 (C-3'), 72.23(C-4'), 71.14 (C-3'), 70.73 (C-2'), 70.60 (C-4''), 68.75 (C-5', & 5''), 63.18 (C-23), 52.19 (C-9), 47.45 (C-5), 47.59 (C-19), 47.51 (C-17), 42.77 (C-4), 42.52 (C-14), 41.84 (C-18), 39.29 (C-8), 38.23 (C-1), 36.18 (C-10), 32.18 (C-21), 31.87 (C-29), 30.76 (C-7 & 22), 26.90 (C-20), 25.58 (C-15), 25.09(C-2), 23.79 (C-27), 23.13 (C-11 & 30), 17.39 (C-16), 16.55 (C-6), 16.38 (C-6'), 15.58 (C-26) , 14.94 (C-25), 12.32 (C-24).

**13:3b,23,28-trihydroxyolean-12-ene 3-O-a-L-arabinopyranoside (1\_4)-a-L-rhamnopyranosyl (1\_4)-b-D-glucopyranoside (new compound):** <sup>1</sup>HNMR (C<sub>5</sub>D<sub>5</sub>N, 600MHz) δ 5.22 (1H, s, H-12), 3.2-3.9 (sugar moieties), 3.82 (1H, H-3), 3.50 (2H, H-23), 3.34 (2H, H-28), 0.70 (3H, s, H-24 ) 0.87 (3H, s, H-26), 0.92 (3H, s, H-29), 0.97 (6H, H-25 & 30), 1.07 (3H, s, 27), 1.26 (3H, d, J=6.18, H-6''). <sup>13</sup> CNMR (C<sub>5</sub>D<sub>5</sub>N, 600MHz) 144.70 (C-13), 121.70 (C-12), 105.08 (C-1'), 103.21 (C-1'''), 99.99 (C-1''), 80.99 (C-3'), 80.68 (C-3 & 3'''), 76.20 (C-5'), 74.79 (C-4'), 73.81 (C-2''), 72.72 (C-4''), 71.36 (C-3''), 70.25 (C-2'''), 69.66 (C-2'), 68.54 (C-5''), 68.20 (C-5'''), 65.59 (C-6'), 63.24 (C-23), 52.17 (C-17), 46.78 (C-5),

46.12 (C-19), 42.58 (C-4), 42.17 (C-14), 42.16 (C-18), 41.29 (C-1 & 21), 39.19 (C-8), 38.30 (C-5'''), 36.26 (C-10), 32.41 (C-29), 32.12 (C-7), 32.12 (C-22 & 7), 30.65 (C-20), 25.20 (C-15), 27.36 (C-2), 25.27 (C-27), 23.98 (C-30 & 11), 23.8 (C-16), 17.50 (C-6), 16.80 (C-26), 16.66 (C-6''), 15.12 (C-25), 12.46 (C-24).

**14: 3-O-[ $\alpha$ -L-rhamnopyranosyl-(1 $\rightarrow$ 2)- $\alpha$ -L-arabinopyranpsyl]-28-o- $\beta$ -d-glucopyranosyl**

**hederagenin:**  $^1\text{H NMR (C}_5\text{D}_5\text{N, 600MHz)}$   $\delta$  6.33 (1H, s, H-12), 5.35 (1H, d, J= 7.38 H-1'''), 5.09 (1H, d, J= 6.42, H-1''), 4.92 (1H, s, H-1') 3.2-3.9 (sugar moieties), 0.93 (3H, s, H-24) 0.96 (3H, s, H-26), 1.02 (3H, s, H-29), 1.15 (3H, s, 27), 1.26 (6H, s, H-30 & 25), 1.58 (3H, CH<sub>3</sub>, H-6''').  $^{13}\text{C NMR (C}_5\text{D}_5\text{N, 600MHz)}$   $\delta$  178.88 (C-28), 142.93 (C-13), 122.56 (C-12), 106.09 (C-1''), 103.24 (C-1'), 99.92 (C-1'''), 81.61 (C-3), 79.72 (C-3'''), 79.70 (C-5'''), 76.91 (C-2'') 74.8 (C-3''') 74.18 (C-4' & 2'''), 73.84 (C-3'), 72.4 (C-2'), 71.52 (C-3'''), 69.7 (C-4''), 68.28 (C-5'), (C-4''), 65.94 (C-5''), 64.74 (C-23), 62.63 (C-6'''), 52.19 (C-9), 47.45 (C-5), 47.59 (C-19), 47.51 (C-17), 42.77 (C-4), 42.52 (C-14), 40.84 (C-18), 39.62 (C-8), 38.30 (C-1), 37.63 (C-10), 32.00 (C-21), 31.49 (C-29), 29.65 (C-7), 28.56 (C-22), 26.90 (C-20), 25.58 (C-15), 24.74 (C-2), 23.79 (C-27), 22.65 (C-11 & 30), 17.39 (C-16), 16.55 (C-6), 16.38 (C-6'), 15.58 (C-26), 14.94 (C-25), 12.32 (C-24).

**15:  $\alpha$ -hederin:**  $^1\text{H NMR (C}_5\text{D}_5\text{N, 600MHz)}$   $\delta$  6.52 (1H, s, H-12), 5.71 (1H, s, H-1''), 5.41 (1H, d, J= 6.12, H-1'''), 3.2-3.9 (sugar moieties), 1.21 (3H, s, H-24) 1.24 (3H, s, H-26), 1.30 (3H, s, H-29), 1.36 (3H, s, 27), 1.52 (6H, s, H-30 & 25), 1.83 (3H, CH<sub>3</sub>, H-6'').  $^{13}\text{C NMR (C}_5\text{D}_5\text{N, 600MHz)}$   $\delta$  180.1 (C-28), 145.46 (C-13), 122.15 (C-12), 104.42 (C-1'), 101.24 (C-1''), 81.61 (C-3), 75.89 (C-2'), 74.75 (C-3'), 74.17 (C-4''), 72.63 (C-3''), 72.41 (C-2''), 69.77 (C-5'), 69.40 (C-5''), 65.77 (C-6'), 64.11 (C-23), 48.28 (C-9), 47.81 (C-4), 46.94 (C-17), 43.59 (C-19 & 5), 42.28 (C-14), 41.07 (C-18), 39.80 (C-8), 39.06 (C-1), 36.99 (C-10), 34.52 (C-21), 33.44 (C-29), 32.96 (C-7 & 22), 31.10 (C-20), 28.59 (C-15), 26.36 (C-27), 26.30 (C-2), 24.03 (C-30), 23.92 (C-11 & 16), 18.62 (C-6), 17.67 (C-26), 16.18 (C-25), 14.07 (C-24).

**Table 1: NMR data of compound 13**

| <b>C#No</b> | <b>C NMR</b> | <b>H NMR</b> | <b>C NMR of sugar</b> | <b>HNMR sugar</b>                   |
|-------------|--------------|--------------|-----------------------|-------------------------------------|
| 1           | 41.29        |              | <b>Glucose (C')</b>   |                                     |
| 2           | 27.36        |              | 105.08                | 4.50 (1H, d, J=7.38, H-1)           |
| 3           | 80.68        | 3.82 (1H)    | 69.66                 | 3.4-3.5 (1H, m, H-2)                |
| 4           | 42.58        |              | 80.99                 | 3.60 (1H, dd, J= 4.36 & 11.20, H-3) |
| 5           | 46.78        |              | 74.79                 | 3.70 (1H, d, J=12.66 H-2)           |
| 6           | 17.50        |              | 76.20                 | 3.34 (1H, m, H-5)                   |
| 7           | 32.12        |              | 65.59                 | 3.92 (2H, m, H-6)                   |
| 8           | 39.19        |              |                       |                                     |

|     |        |              |                       |                            |
|-----|--------|--------------|-----------------------|----------------------------|
| 9   | 47.66  |              | <b>Rhamnose (C'')</b> |                            |
| 10  | 36.26  |              | 99.99                 | 5.22 (1H, s, H-1)          |
| 11  | 23.8   |              | 73.81                 | 3.31 (1H, m, H-2)          |
| 12  | 121.70 | 5.22 (1H, s) | 71.36                 | 3.53 (1H, t, H-4)          |
| 13  | 144.70 |              | 72.72                 | 3.70 (1H, d, J= 8.11, H-4) |
| 14  | 42.17  |              | 68.54                 | 3.94 (1H, m, H-5)          |
| 15  | 25.20  |              | 16.66                 | 1.26 (3H, d, J=6.18, H-6)  |
| 16  | 23.8   |              |                       |                            |
| 17  | 52.17  |              | <b>Xylose (C''')</b>  |                            |
| 18  | 42.16  |              | 103.21                | 4.53 (1H, d, J= 5.16, H-1) |
| 19  | 46.12  |              | 70.25                 | 4.09 (1H, s, H-3)          |
| 120 | 30.65  |              | 80.67                 | 3.83 (1H, m, H-3)          |
| 21  | 41.29  |              | 68.20                 | 3.77 (1H, brs, H-4)        |
| 22  | 32.12  |              | 38.30                 | 1.62 (2H, m, H-5)          |

|    |       |              |  |  |
|----|-------|--------------|--|--|
| 23 | 63.24 | 3.50 (2H)    |  |  |
| 24 | 12.46 | 0.70 (3H, s) |  |  |
| 25 | 15.12 | 0.97 (3H, s) |  |  |
| 26 | 16.80 | 0.87 (3H, s) |  |  |
| 27 | 25.27 | 1.07 (3H, s) |  |  |
| 28 | 64.00 | 3.34 (2H)    |  |  |
| 29 | 32.41 | 0.92 (3H, s) |  |  |
| 30 | 23.98 | 0.97 (3H, s) |  |  |

**Table 2: IC<sub>50</sub> value of bioassays of isolated compounds from *Nigella sativa***

| Sr#No | IC <sub>50</sub> (μM)                                       |            |            |                     |             |
|-------|-------------------------------------------------------------|------------|------------|---------------------|-------------|
|       | Compounds name                                              | DPPH assay | ABTS assay | α-glucosidase assay | PTP1B assay |
|       | 3-O-[β-D-xylopyranosyl-(1-3)-α-L-rhamnopyranosyl-(1-2)-α-L- |            |            |                     |             |



|    |                                                                                                                                                                 |    |    |                   |    |
|----|-----------------------------------------------------------------------------------------------------------------------------------------------------------------|----|----|-------------------|----|
| 1. | arabinopyranosyl]-<br>28-O-[ $\alpha$ -L-<br>rhamnopyranosyl-(1-<br>4)- $\beta$ -D-<br>glucopyranosyl-(1-<br>6)- $\beta$ -D-<br>glucopyranosyl]-<br>hederagenin | Nd | Nd | 217.51 $\pm$ 2.63 | Nd |
| 2. | Flaccidoside III                                                                                                                                                | Nd | Nd | 256.71 $\pm$ 3.79 | Nd |
| 3. | Catechol                                                                                                                                                        | Nd | Nd | Nd                | Nd |
| 4. | quercetin-3-<br>gentiobiosides                                                                                                                                  | Nd | Nd | 254.29 $\pm$ 4.51 | Nd |

|     |                                |              |               |               |             |
|-----|--------------------------------|--------------|---------------|---------------|-------------|
| 5.  | Magnoflorine                   | 71.03 ± 0.5  | 139.2 ± 0.5   | 335.38 ± 0.2  | Nd          |
| 6.  | Nigelflavonoside B             | 32.76 ± 0.12 | 95.18 ± 0.9   | 257.86 ± 0.88 | Nd          |
| 7.  | Nigelloside                    | Nd           | Nd            | 276.23 ± 2.1  | Nd          |
| 8.  | Quercetin<br>sphorotrioside    | 35.5 ± 0.5   | 98.87 ± 0.5   | 274.1 ± 0.32  | Nd          |
| 9.  | kaempferol-3,<br>7-diglucoside | 197.8 ± 2.7  | 247 ± 2.79    | 360.0 ± 0.39  | Nd          |
| 10. | kaempferol<br>3-O-rutinoside   | Nd           | Nd            | 214.53 ± 0.09 | Nd          |
| 11. | Rutin                          | 39.67 ± 0.5  | 129.00 ± 0.55 | 331.93 ± 1.69 | Nd          |
| 12. | 3-O-[α-L-<br>rhamnopyranosyl-  | Nd           | Nd            | Nt            | 91.30 ± 2.5 |

|     |                                                                                                                                                                                |    |    |    |    |
|-----|--------------------------------------------------------------------------------------------------------------------------------------------------------------------------------|----|----|----|----|
|     | (1→2)- $\alpha$ -L-arabinopyranosyl]-<br><br>hederagenin                                                                                                                       |    |    |    |    |
| 13. | 3b, 23, 28-<br>trihydroxyolean-12-<br>ene-3-O- $\alpha$ -L-<br>arabinopyranoside<br><br>(1__4)- $\alpha$ -L-<br>rhamnopyranosyl<br><br>(1__ 4)- $\beta$ -D-<br>glucopyranoside | Nd | Nd | Nt | Nd |

|     |                                                                                                                                  |                 |                 |                   |    |
|-----|----------------------------------------------------------------------------------------------------------------------------------|-----------------|-----------------|-------------------|----|
| 14. | 3-O-[ $\alpha$ -L-rhamnopyranosyl-(1 $\rightarrow$ 2)- $\alpha$ -L-arabinopyranpsyl]-28-o- $\beta$ -d-glucopyranosyl hederagenin | Nd              | Nd              | Nt                | Nd |
| 15. | $\alpha$ -hederin                                                                                                                | Nd              | Nd              | Nt                | Nd |
| 16. | Ascorbic acid                                                                                                                    | 51.73 $\pm$ 0.1 | Nt              | Nt                | Nt |
| 17. | Trolox                                                                                                                           | 59.48 $\pm$ 0.9 | Nt              | Nt                | Nt |
| 18. | Allopurinol                                                                                                                      | Nt              | 92.54 $\pm$ 2.3 | Nt                | Nt |
| 19. | Acarbose                                                                                                                         | Nt              | Nt              | 127.93 $\pm$ 2.02 | Nt |

|     |              |    |    |    |                |
|-----|--------------|----|----|----|----------------|
| 20. | Ursolic acid | Nt | Nt | Nt | $0.85 \pm 1.4$ |
|-----|--------------|----|----|----|----------------|

Nt: not tested, Nd: not detected
